# Supplementary material for: Pseudomonas aeruginosa ExlA and Serratia marcescens ShlA trigger cadherin cleavage by promoting calcium influx and ADAM10 activation
Source: PubMed Central journal article supplement (PMC5584975; doi:10.1371/journal.ppat.1006579), 2017-08-23
Supplement: ppat.1006579.s001.pdf [file ppat.1006579.s001.pdf]

***Pseudomonas aeruginosa* ExlA and *Serratia marcescens* ShlA trigger cadherin cleavage by promoting calcium influx and ADAM10 activation**

Emeline Reboud<sup>1</sup>, Stéphanie Bouillot<sup>1</sup>, Sabine Patot<sup>2</sup>, Benoît Béganton<sup>1</sup>, Ina Attrée<sup>1</sup> and Philippe Huber<sup>1\*</sup>

**Supporting Information**

**S1 Table: *P. aeruginosa*, *S. marcescens* and *E. coli* strains used in this work**

| Strains                              | Description                                                            | Abbreviations                      | Refs      |
|--------------------------------------|------------------------------------------------------------------------|------------------------------------|-----------|
| <b><i>Pseudomonas aeruginosa</i></b> |                                                                        |                                    |           |
| PAO1F (RP1831)                       | Wild-type laboratory strain T3SS+ ( <i>exoS,T,Y</i> )                  | PAO1F                              | [1]       |
| CHA                                  | Wild-type laboratory strain T3SS+ ( <i>exoS,T,Y</i> )                  | CHA                                | [2]       |
| PA14                                 | Wild-type laboratory strain T3SS+ ( <i>exoU,T,Y</i> )                  | PA14                               | [3]       |
| CLJ1                                 | Clinical strain T3SS-, ExIA+                                           | CLJ1                               | [4]       |
| IHMA879472                           | Clinical strain T3SS-, ExIA+                                           | IHMA87                             | [5]       |
| IHMA87 $\Delta$ <i>exIA</i>          | IHMA87 with <i>exIA</i> inactivated                                    | IHMA87 $\Delta$ <i>exIA</i>        | [6]       |
| IHMA87 $\Delta$ <i>exIA/exIA</i>     | IHMA87 $\Delta$ <i>exIA</i> with plasmidic expression of <i>exIA</i>   | IHMA87 $\Delta$ <i>exIA/exIA</i>   | This work |
| IHMA87 $\Delta$ <i>exIA::exIBA</i>   | IHMA87 $\Delta$ <i>exIA</i> with chromosomal insertion of <i>exIBA</i> | IHMA87 $\Delta$ <i>exIA::exIBA</i> | [6]       |
| IHMA87 $\Delta$ <i>pilA</i>          | IHMA87 with <i>pilA</i> deletion                                       | IHMA87 $\Delta$ <i>pilA</i>        | [6]       |
| <b><i>Serratia marcescens</i></b>    |                                                                        |                                    |           |
| Db11                                 | Clinical strain expressing ShIA                                        |                                    | [7]       |
| 21C4                                 | <i>shIB</i> mutant of Db11 with no secretion of ShIA                   |                                    | [8]       |
| <b><i>Escherichia coli</i></b>       |                                                                        |                                    |           |
| TOP10 pSW196                         | Strain containing pSW196 vector only                                   | <i>E. coli</i> -vector             | [4]       |
| TOP10 pSW196 <i>exIBA</i>            | Strain expressing the <i>exIBA</i> operon                              | <i>E. coli</i> - <i>exIBA</i>      | [4]       |

**References**

1. Cisz M, Lee PC, Rietsch A (2008) ExoS controls the cell contact-mediated switch to effector secretion in *Pseudomonas aeruginosa*. *J Bacteriol* 190: 2726-2738.
2. Toussaint B, Delic-Attree I, Vignais PM (1993) *Pseudomonas aeruginosa* contains an IHF-like protein that binds to the *algD* promoter. *Biochem Biophys Res Commun* 196: 416-421.
3. Berthelot P, Attree I, Plesiat P, Chabert J, de Bentzmann S, et al. (2003) Genotypic and phenotypic analysis of type III secretion system in a cohort of *Pseudomonas aeruginosa* bacteremia

isolates: evidence for a possible association between O serotypes and exo genes. *J Infect Dis* 188: 512-518.

4. Elsen S, Huber P, Bouillot S, Coute Y, Fournier P, et al. (2014) A type III secretion negative clinical strain of *Pseudomonas aeruginosa* employs a two-partner secreted exolysin to induce hemorrhagic pneumonia. *Cell Host Microbe* 15: 164-176.
5. Kos VN, Deraspe M, McLaughlin RE, Whiteaker JD, Roy PH, et al. (2015) The resistome of *Pseudomonas aeruginosa* in relationship to phenotypic susceptibility. *Antimicrob Agents Chemother* 59: 427-436.
6. Basso P, Ragno M, Elsen S, Reboud E, Golovkine G, et al. (2017) *Pseudomonas aeruginosa* Pore-Forming Exolysin and Type IV Pili Cooperate To Induce Host Cell Lysis. *MBio* 8.
7. Flyg C, Kenne K, Boman HG (1980) Insect pathogenic properties of *Serratia marcescens*: phage-resistant mutants with a decreased resistance to *Cecropia* immunity and a decreased virulence to *Drosophila*. *J Gen Microbiol* 120: 173-181.
8. Kurz CL, Chauvet S, Andres E, Aurouze M, Vallet I, et al. (2003) Virulence factors of the human opportunistic pathogen *Serratia marcescens* identified by in vivo screening. *EMBO J* 22: 1451-1460.

## **Supplemental Method**

### ***Bacterial transmigration across Transwell devices***

Three days before infection, A549 cells ( $6 \times 10^4$ ) were seeded in DMEM medium on Transwell filters (Greiner ThinCert 24 well, 3.0  $\mu\text{m}$ ). At day 0, the medium was replaced and bacteria (MOI 10) were added in the upper compartment. At 4 h.p.i., 100  $\mu\text{L}$  of medium in the lower compartment were withdrawn, serially diluted and spotted onto LB-agar plates to determine the number of transmigrated bacteria.
