# Supplementary material for: Pseudomonas aeruginosa ExlA and Serratia marcescens ShlA trigger cadherin cleavage by promoting calcium influx and ADAM10 activation
Source: PubMed Central journal article supplement (PMC5584975; doi:10.1371/journal.ppat.1006579), 2017-08-23
Supplement: ppat.1006579.s002.pdf [file ppat.1006579.s002.pdf]

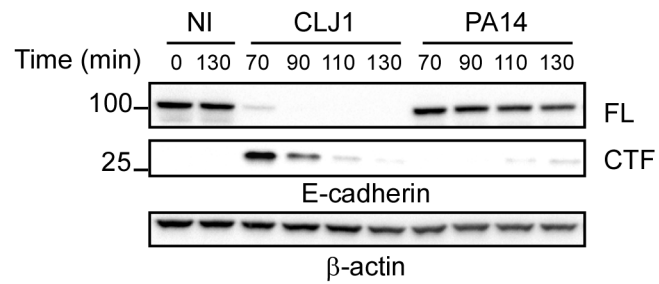

**S1 Figure: Absence of E-cadherin cleavage in cells incubated with an ExoU-positive *P. aeruginosa* strain.**

A549 cells were incubated with CLJ1, PA14 (ExoU+) or were mock-infected with LB. Cellular extracts were analysed for their E-cadherin contents. The experiment was performed twice with similar results.
