# Supplementary material for: Pseudomonas aeruginosa ExlA and Serratia marcescens ShlA trigger cadherin cleavage by promoting calcium influx and ADAM10 activation
Source: PubMed Central journal article supplement (PMC5584975; doi:10.1371/journal.ppat.1006579), 2017-08-23
Supplement: ppat.1006579.s003.pdf [file ppat.1006579.s003.pdf]

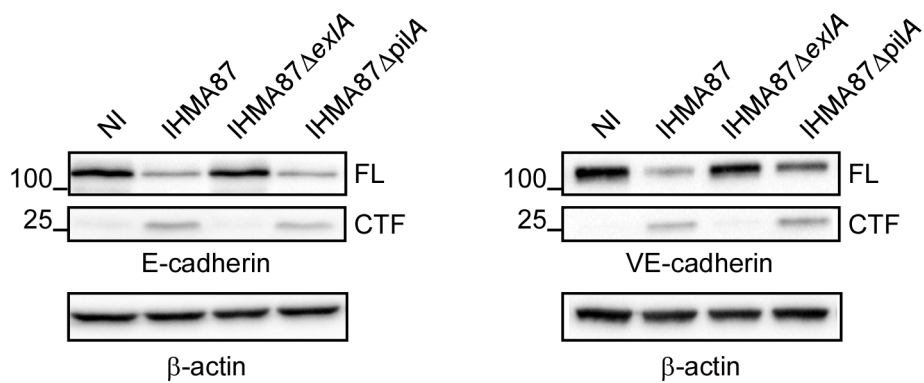

**S2 Figure: Absence of pili did not prevent cadherin degradation**

A549 cells (left) or HUVECs (right) were incubated with IHMA87, IHMA87 $\Delta$ exIA or IHMA87 $\Delta$ pilA bacteria. Cellular extracts were analysed for their E- or VE-cadherin contents after 2 h.p.i.. The results are representative of three experiments for A549 cells and two experiments for HUVECs.
