# Supplementary material for: Pseudomonas aeruginosa ExlA and Serratia marcescens ShlA trigger cadherin cleavage by promoting calcium influx and ADAM10 activation
Source: PubMed Central journal article supplement (PMC5584975; doi:10.1371/journal.ppat.1006579), 2017-08-23
Supplement: ppat.1006579.s005.pdf [file ppat.1006579.s005.pdf]

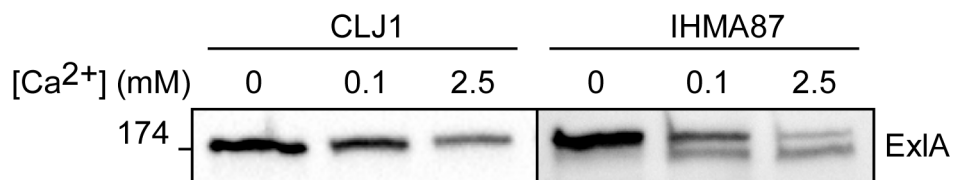

**S4 Figure: Calcium depletion increases ExIA secretion**

A549 cells were incubated with CLJ1 or IHMA87 bacteria in Tyrode buffer with various Ca<sup>2+</sup> concentrations. The supernatants were harvested after 2 hours, TCA-precipitated and analysed by Western blot for their content in ExIA. The results are representative of three experiments.
