# Supplementary material for: Pseudomonas aeruginosa ExlA and Serratia marcescens ShlA trigger cadherin cleavage by promoting calcium influx and ADAM10 activation
Source: PubMed Central journal article supplement (PMC5584975; doi:10.1371/journal.ppat.1006579), 2017-08-23
Supplement: ppat.1006579.s006.pdf [file ppat.1006579.s006.pdf]

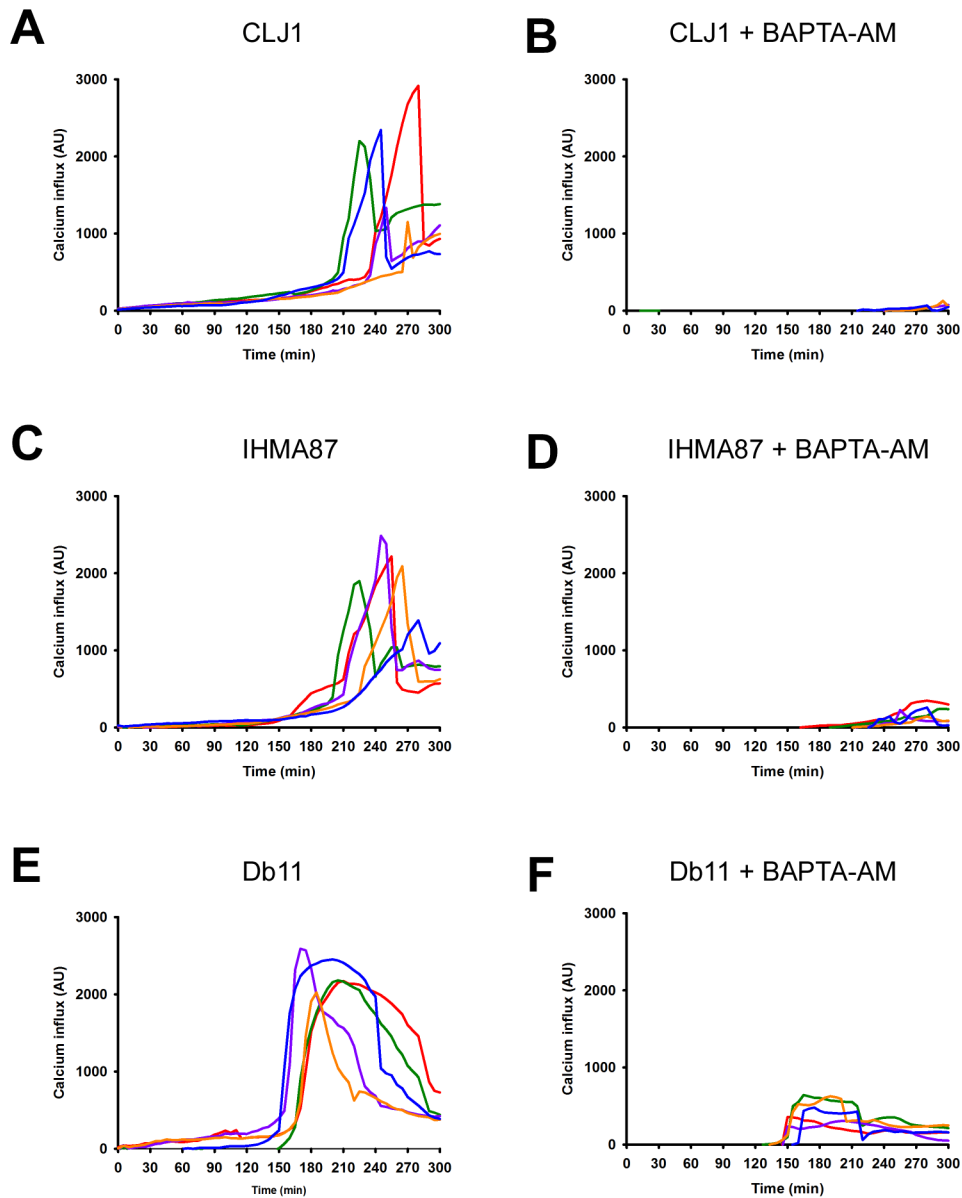

### S5 Figure: Visualisation of $\text{Ca}^{2+}$ titration by BAPTA-AM

A549 cells were pre-incubated with BAPTA-AM and Fluo3-AM and incubated with CLJ1, IHMA87 or Db11. Fluo3 signals were followed by videomicroscopy. Each coloured line represent the signal for a single cell. BAPTA-AM totally or partially inhibited the available cytosolic  $\text{Ca}^{2+}$  depending on the strain. The data are representative of three independent experiments.
